# Supplementary material for: Thousands of RAD-seq Loci Fully Resolve the Phylogeny of the Highly Disjunct Arctic-Alpine Genus Diapensia (Diapensiaceae)
Source: PLoS One. 2015 Oct 8;10(10):e0140175. doi: 10.1371/journal.pone.0140175 (PMC4598014; doi:10.1371/journal.pone.0140175)
Supplement: S1 Table — (XLSX) [file pone.0140175.s002.xlsx]

## Sheet: Sheet1
S1 Table. Samples analysed in this study.
Taxa	Sequence ID	Country	Locality	Collection Date	Collector	Collection No.	Latitude	Longitude	Altitude (m)	Source
DNA bank no
Diapensia lapponica L.
O-DP-55956	Dialap_55956_NewHam_USA	USA	New Hampshire, Coos County, Mt. Washington, NE side of Auto Road on Huntington Ravine Trail.	2012-10-02	Hou Y & Boufford DE	YH12-27-1	44.2775	-71.2939	1750	O
O-DP-47410	Dialap_47410_Nuuk_GRL	Greenland	Nuuk, Qinngorput, between mountains Lille and Store Malene.	2006-07-20	Westergaard KB, Flatberg KI and Flatberg BB	KW06-34-7	64.1748	-51.661	60	O
O-DP-47250	Dialap_47250_Nord_NOR	Norway	Nordland, Rana, SE of Mo i Rana, E slopes of Mt. Hellerfjellet.	2006-08-10	Patrik RM	KW06-2-1	66.1922	14.5461	736	O
O-DP-43266	Dialap_43266_W_RUS	Russia	Komi ASSR, Yugyd-Va National Park, Maldy Nyrd-range.	2004-06-30	Tribsch A	AK-4450-2	65.351	60.655	500	O
D. obovata (F. Schmidt) Nakai
O-DP-55953	Diaobo_55953_Iwate_JPN	Japan	Hayachine Mountain region	2010-07-28	Hajime Ikeda		39.5303	141.495		PC1
O-DP-55954	Diaobo_55954_Esso_RUS	Russia	Esso.	2011-08-10	Hajime Ikeda		55.9017	158.775		PC1
O-DP-6378	Diaobo_6378_Chuk_RUS	Russia	Chukotka, Chukchi Peninsula, Lavrentiya Bay, bay 19 km NW of Lavrentiya, S of Mys Skritii.	2005-08-02	Solstad H & Elven R	05/0548-1	65.6967	-171.317		O
O-DP-53658	Diaobo_53658_ALA_USA	USA	Alaska, Seward Peninsula: Kougarok Road, W-most high point on road into Pilgrim Hot Springs.	2005-08-27	Parker CL & Solstad H	05/1263-2	64.05	-164.797		O
D. himalaica J.D.Hooker & Thomson
O-DP-55962	Diahim_55962_Xinhua_CHN	China	Yunnan, Xinhua, along the track to Fugong.	2010-10-25	Nielsen RA	RAN195-1	27.0706	98.9765	3917	O
O-DP-55976	Diahim_55976_Baima_CHN	China	Yunnan, Baima Snow Mt., southern mountain pass.	2010-10-21	Hou Y & Nielsen RA	YH10-20-9	28.3349	99.0773	4434	O
O-DP-55969	Diahim_55969_Baima_CHN	China	Yunnan, Baima Snow Mt., southern mountain pass.	2010-10-21	Hou Y & Nielsen RA	YH10-20-2	28.3349	99.0773	4434	O
D. purpurea Diels
O-DP-56014	Diapur_56014_Cangshan_CHN	China	Yunnan, Dali, E Cang Shan.	2010-10-15	Hou Y & Nielsen RA	YH10-3-3	25.6803	100.096	3730	O
O-DP-56025	Diapur_56025_Cangshan_CHN	China	Yunnan, Dali, E Cang Shan.	2010-10-15	Hou Y & Nielsen RA	YH10-7-1	25.6774	100.092	3911	O
O-DP-56031	Diapur_56031_Zhiziluo_CHN	China	Yunnan, Zhi-zi-luo, the top of the mountain.	2010-11-01	Nielsen RA	RAN253-a	26.5134	99.0127	3990	O
Schizocodon soldanelloides Siebold & Zucc.
O-DP-56079	Schsol_56079_Daisen_JPN	Japan	Daisen		Higashi H	Sc223	35.3747	133.374		PC2
O-DP-56080	Schsol_56080_Daisen_JPN	Japan	Daisen		Higashi H	Sc232	35.3747	133.374		PC2
Shortia uniflora Maxim.
O-DP-56090	Shouni_56090_Ashiu_JPN	Japan	Ashiu		Higashi H	Sho6	35.3025	135.725		PC2
O-DP-56091	Shouni_56091_Ashiu_JPN	Japan	Ashiu		Higashi H	Sho7	35.3025	135.725		PC2
DNA bank no: All samples were registed in the DNA Bank of the Natural History Museum in Oslo (O) and given a unique DNA bank number.
Source: PC1: personal collection from Hajime Ikeda; PC2: personal collection from Hiroyuki Higashi.
